# Supplementary material for: Comparison of salt-related knowledge, attitudes and behaviours between parents and caregivers of children under 18 years of age and other adults who do not care for children under 18 years of age in Victoria, Australia
Source: PubMed Central journal article supplement — BMJ Nutr Prev Health. 2019 Jul 16;2(2):51–62. doi: 10.1136/bmjnph-2018-000018 (PMC7664484; doi:10.1136/bmjnph-2018-000018), 2019-07-16
Supplement: bmjnph-2018-000018supp004.pdf [file bmjnph-2018-000018supp004.pdf]

**Supplementary table 3.** Frequency of using the Health Star Rating to choose breakfast cereals, cheese and bread as reported by parents and other adults

| <b>Behaviour</b>         | <b>Parents of a child/children &lt;18 years of age (n=840)</b> | <b>Other participants (n=1558)</b> |
|--------------------------|----------------------------------------------------------------|------------------------------------|
| <b>Breakfast cereals</b> |                                                                |                                    |
| Usually (%)              | 19                                                             | 13                                 |
| Sometimes (%)            | 30                                                             | 24                                 |
| Never (%)                | 43                                                             | 53                                 |
| Don't know* (%)          | 8                                                              | 10                                 |
| <b>Cheese</b>            |                                                                |                                    |
| Usually (%)              | 11                                                             | 7                                  |
| Sometimes (%)            | 25                                                             | 20                                 |
| Never (%)                | 56                                                             | 63                                 |
| Don't know* (%)          | 8                                                              | 10                                 |
| <b>Bread</b>             |                                                                |                                    |
| Usually (%)              | 10                                                             | 8                                  |
| Sometimes (%)            | 27                                                             | 21                                 |
| Never (%)                | 55                                                             | 61                                 |

---

Don't know\* (%)

8

10

---

\*Response option excluded from analysis due to a low number of participants selecting this option
