# Supplementary material for: Comparison of salt-related knowledge, attitudes and behaviours between parents and caregivers of children under 18 years of age and other adults who do not care for children under 18 years of age in Victoria, Australia
Source: PubMed Central journal article supplement — BMJ Nutr Prev Health. 2019 Jul 16;2(2):51–62. doi: 10.1136/bmjnph-2018-000018 (PMC7664484; doi:10.1136/bmjnph-2018-000018), 2019-07-16
Supplement: bmjnph-2018-000018supp005.pdf [file bmjnph-2018-000018supp005.pdf]

**Supplementary table 4.** The proportion of parents/caregivers and other adults responding correctly to salt-related knowledge questions

| <b>Question*</b>                                  | <b>Parents/caregivers of a child/children<br/>&lt;18 years of age (n=840)<br/>(%)</b> | <b>Other adults (n=1558)<br/>(%)</b> |
|---------------------------------------------------|---------------------------------------------------------------------------------------|--------------------------------------|
| <b>Relationship between salt and sodium</b>       |                                                                                       |                                      |
| They are exactly the same                         | 46                                                                                    | 47                                   |
| <i>Salt contains sodium</i>                       | 29                                                                                    | 34                                   |
| Sodium contains salt                              | 5                                                                                     | 3                                    |
| Don't know                                        | 20                                                                                    | 16                                   |
| <b>Awareness of salt intake among Australians</b> |                                                                                       |                                      |
| <i>Far too much</i>                               | 35                                                                                    | 34                                   |
| <i>Too much</i>                                   | 49                                                                                    | 50                                   |
| Just the right amount                             | 8                                                                                     | 7                                    |
| Too little                                        | 1                                                                                     | 1                                    |
| Far too little                                    | 1                                                                                     | 1                                    |
| Don't know                                        | 6                                                                                     | 7                                    |
| <b>Main source of salt in the Australian diet</b> |                                                                                       |                                      |
| Adding salt during cooking                        | 20                                                                                    | 17                                   |
| <i>Salt from processed foods</i>                  | 73                                                                                    | 76                                   |
| Salt from natural sources                         | 2                                                                                     | 2                                    |
| Don't know                                        | 5                                                                                     | 5                                    |
| <b>Salt intake recommendation</b>                 |                                                                                       |                                      |
| 3 g/day                                           | 27                                                                                    | 28                                   |
| 5 g/day                                           | 30                                                                                    | 26                                   |
| 8 g/day                                           | 11                                                                                    | 10                                   |
| 10 g/day                                          | 5                                                                                     | 5                                    |

|                                                                                              |    |    |
|----------------------------------------------------------------------------------------------|----|----|
| 15 g/day                                                                                     | 1  | 1  |
| Don't know                                                                                   | 26 | 30 |
| <b>Eating too much salt could damage health</b>                                              |    |    |
| <i>Yes</i>                                                                                   | 91 | 90 |
| No                                                                                           | 4  | 4  |
| Don't know                                                                                   | 5  | 6  |
| <b>Himalayan salt, pink salt, sea salt and gourmet salts are healthier than regular salt</b> |    |    |
| <i>Strongly disagree</i>                                                                     | 6  | 10 |
| <i>Disagree</i>                                                                              | 17 | 18 |
| Neither agree nor disagree                                                                   | 34 | 38 |
| Agree                                                                                        | 33 | 27 |
| Strongly agree                                                                               | 10 | 7  |
| <b>Health risks associated with a high salt intake</b>                                       |    |    |
| <b>High blood pressure</b>                                                                   |    |    |
| <i>Yes</i>                                                                                   | 83 | 82 |
| No                                                                                           | 7  | 5  |
| Don't know                                                                                   | 10 | 13 |
| <b>Kidney disease</b>                                                                        |    |    |
| <i>Yes</i>                                                                                   | 63 | 62 |
| No                                                                                           | 12 | 8  |
| Don't know                                                                                   | 25 | 30 |
| <b>Heart disease/Heart attack</b>                                                            |    |    |
| <i>Yes</i>                                                                                   | 76 | 77 |

|                       |    |    |
|-----------------------|----|----|
| No                    | 10 | 7  |
| Don't know            | 14 | 16 |
| <b>Stroke</b>         |    |    |
| <i>Yes</i>            | 67 | 65 |
| No                    | 13 | 10 |
| Don't know            | 20 | 25 |
| <b>Stomach cancer</b> |    |    |
| <i>Yes</i>            | 30 | 28 |
| No                    | 21 | 17 |
| Don't know            | 49 | 55 |

\*Correct response in italics
